# Supplementary material for: Facile synthesis of porous LiMn2O4 nano-cubes for ultra-stable lithium-ion battery cathodes
Source: Royal Society of Chemistry journal article supplement (doi:10.1039/d2nj06023j), 2023-01-01
Supplement: d2nj06023j1.pdf [file d2nj06023j1.pdf]

### Supporting Information for

## Facile synthesis of porous $\text{LiMn}_2\text{O}_4$ nano-cubes for ultra-stable lithium-ion battery cathodes

Haiyun Cheng, Caiyu Ma, Wenyao Li \*

School of Materials Science and Engineering, Shanghai University of Engineering Science, Shanghai 201620, China

\*Corresponding author, E-mail: [liwenyao314@gmail.com](mailto:liwenyao314@gmail.com)

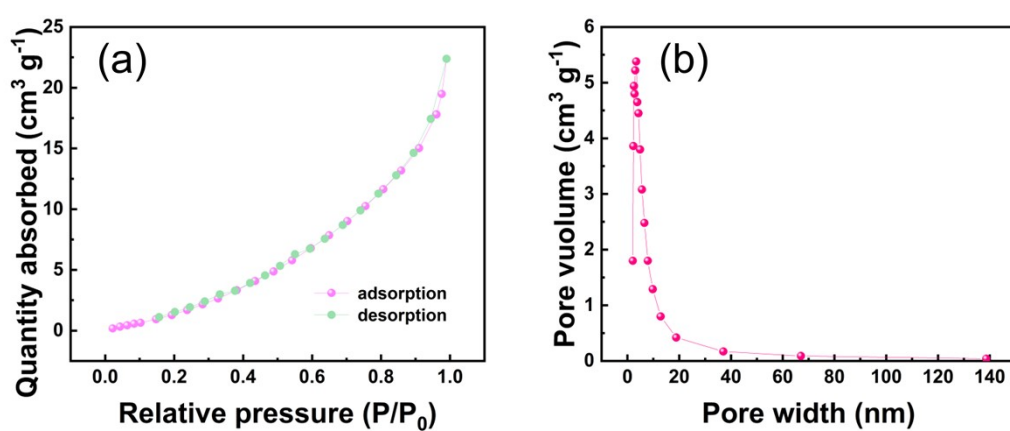

Fig. S1 (a) N<sub>2</sub> adsorption-desorption isotherm of LMO; (b) Pore size distribution profiles

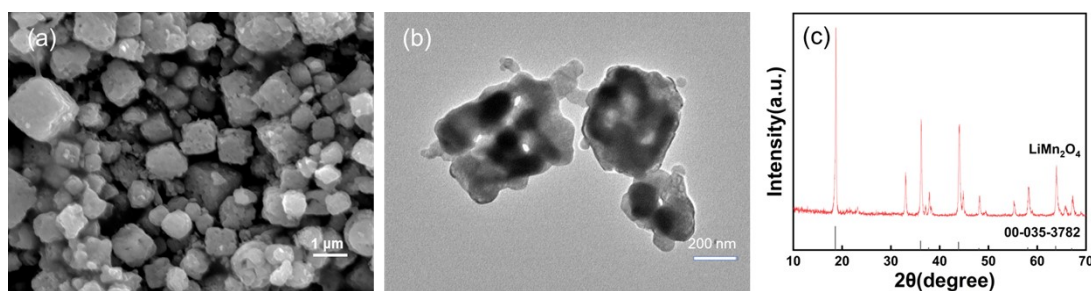

Fig. S2 (a) SEM, (b) TEM and (c) XRD of LMO after cycling

**Table S1:** Comparison of the cycling performance in this work with published literature

| Active material                                                                              | Synthesis route             | Coating or doping  | Charge-discharge rate (C) | Cycle number | Initial specific capacity (mAh g <sup>-1</sup> ) | Capacity retention | Ref. |
|----------------------------------------------------------------------------------------------|-----------------------------|--------------------|---------------------------|--------------|--------------------------------------------------|--------------------|------|
| LiNi <sub>0.5</sub> Mn <sub>1.5</sub> O <sub>4</sub>                                         | microwave-assisted          | coating and doping | 0.1                       | 100          | 132                                              | 95.3%              | [1]  |
| LiNi <sub>0.02</sub> Fe <sub>0.05</sub> Mn <sub>1.93</sub> O <sub>4</sub>                    | solid-state                 | doping             | 1                         | 500          | 113.4                                            | 76.9%              | [2]  |
| Fe-LiMn <sub>2</sub> O <sub>4</sub>                                                          | solid-state                 | doping             | 0.3                       | 200          | 89.2                                             | 89%                | [3]  |
| LiMn <sub>2</sub> O <sub>4</sub>                                                             | solid-state                 | none               | 1                         | 100          | 115.7                                            | 68%                | [4]  |
| LiMn <sub>2</sub> O <sub>4</sub>                                                             | solid-state                 | none               | 1                         | 100          | 128.7                                            | 86.2%              | [5]  |
| LiMn <sub>2</sub> O <sub>4</sub>                                                             | solid-state                 | none               | 0.2                       | 50           | 119.1                                            | 87.2%              | [6]  |
| LiMn <sub>2</sub> O <sub>4</sub> @rGO                                                        | hydrothermal                | coating            | 0.5                       | 200          | 137.5                                            | 75%                | [7]  |
| LiMn <sub>2</sub> O <sub>4</sub>                                                             | solid state                 | none               | 0.2                       | 100          | 129.8                                            | 95%                | [8]  |
| Li <sub>0.09</sub> K <sub>0.91</sub> Mn <sub>2</sub> O <sub>4</sub>                          | solid-state                 | doping             | 0.5                       | 120          | 137                                              | 94.8%              | [9]  |
| LiMn <sub>2</sub> O <sub>4</sub> /graphene                                                   | solid-state                 | coating            | 10                        | 160          | 121.9                                            | 82.9%              | [10] |
| LiMn <sub>2</sub> O <sub>4</sub>                                                             | hydrothermal                | none               | 0.1                       | 50           | 120                                              | 84.1%              | [11] |
| LiMg <sub>0.05</sub> Mn <sub>1.95</sub> O <sub>4</sub>                                       | molten-salt combustion      | doping             | 1                         | 100          | 122                                              | 86.4%              | [12] |
| Li <sub>1.05</sub> Al <sub>0.02</sub> Mn <sub>1.98</sub> F <sub>0.02</sub> O <sub>3.98</sub> | solid-state                 | doping             | 0.1                       | 367          | 115.5                                            | 80%                | [13] |
| LiMn <sub>2</sub> O <sub>4</sub>                                                             | precipitation-freeze drying | none               | 2                         | 500          | 103.3                                            | 87.1%              | [14] |
| LiAl <sub>0.15</sub> Mn <sub>1.85</sub> O <sub>4</sub>                                       | solid-state                 | doping             | 1                         | 1000         | 103.3                                            | 72%                | [15] |
| LiMn <sub>2</sub> O <sub>4</sub>                                                             | microwave synthesis         | none               | 0.5                       | 100          | 118.4                                            | 74.7%              | [16] |
| LiMn <sub>2</sub> O <sub>4</sub>                                                             | solid-state                 | none               | 1                         | 100          | 134                                              | 95.5%              | [17] |
| LiMn <sub>2</sub> O <sub>4</sub>                                                             | homogeneous precipitation   | none               | 0.1                       | 100          | 112.5                                            | 92.5               | [18] |
| LiMn <sub>2</sub> O <sub>4</sub> /graphene                                                   | solid-state                 | coating            | 1                         | 500          | 111.5                                            | <80%               | [19] |
| <b>★This work</b>                                                                            | <b>solid-state</b>          | <b>none</b>        | <b>1</b>                  | <b>500</b>   | <b>104</b>                                       | <b>90.91%</b>      |      |

## References

1. Z. A. Qureshi, H. A. Tariq, H. M. Hafiz, R. A. Shakoor, S. AlQaradawi and R. Kahraman, *J. Alloys Compd.*, 2022, **920**, 165989.
2. Y. Ji, H. Liu, Y. Guo, J. Guo, M. Xiang, W. Bai, X. Liu and H. Bai, *Colloids Surf., A*, 2022, **648**, 129259.
3. S. N. Lee, D. H. Park, J. H. Kim, S. H. Moon, J. S. Jang, S. B. Kim, J. H. Shin, Y. Y. Park, and K. W. Park, *ChemElectroChem*, 2022, **9**, e202200385.
4. P. Li, S.h. Luo, X. Wang, L. Wang, J. Wang, F. Teng, Q. Wang, Y. Zhang, X. Liu, H. Zhang, J. Liang and X. Duan, *Sep. Purif. Technol.*, 2021, **278**, 119611.
5. Z. Chen, K. Huang, S. Liu and H. Wang, *Trans. Nonferrous Met. Soc. China*, 2010, **20**, 2309-2313.
6. X. Zhou, M. Chen, H. Bai, C. Su, L. Feng and J. Guo, *Vacuum*, 2014, **99**, 49-55.
7. Y. Chen, Y. Tian, Y. Qiu, Z. Liu, H. He, B. Li and H. Cao, *Mater. Today Adv.*, 2019, **1**, 100001.
8. Q. Jiang, H. Zhang and S. Wang, *Green Chem.*, 2016, **18**, 662-666.
9. L. Xiong, Y. Xu, X. Xiao, J. Wang and Y. Li, *Electron. Mater. Lett.*, 2015, **11**, 138-142.
10. Z. Li, X. Feng, L. Mi, J. Zheng, X. Chen and W. Chen, *Nano Res.*, 2018, **11**, 4038-4048.
11. X. Xiang, Z. Fu and W. Li, *J. Solid State Electrochem.*, 2013, **17**, 1201-1206.
12. J. Huang, F. Yang, Y. Guo, C. Peng, H. Bai, J. Peng and J. Guo, *Ceram. Int.*, 2015, **41**, 9662-9667.
13. P. Li, S. h. Luo, J. Wang, X. Wang, Y. Tian, H. Li, Q. Wang, Y. Zhang and X. Liu, *Int. J. Energ. Res.*, 2021, **45**, 21158-21169.
14. X. Li, L. Yu, Y. Zhang, H. Shao and W. Zhang, *Ionics*, 2019, **26**, 1591-1598.
15. S. Wang, M. Xiang, Y. Lu, J. Guo, C. Su, H. Bai and X. Liu, *J. Mater. Sci.: Mater. Electron*, 2020, **31**, 6036-6044.
16. X. Liu, P. Liu and H. Wang, *Ionics*, 2019, **25**, 5213-5220.
17. S. Xie, M. Yuan, T. Wang, J. Liu, J. Yan, Z. Li and J. Peng, *Ceram. Int.*, 2022, **48**, 10113-10119.
18. S. Dai, F. Zeng, J. Zhang, X. Li and Z. Shao, *Ionics*, 2021, **27**, 4233-4240.
19. Q. Ge, D. Wang, F. Li, D. Chen, G. Ping, M. Fan, L. Qin, L. Bai, G. Tian, C. Lv and K. Shu, *Russ. J. Electrochem.*, 2015, **51**, 125-133.
